# Supplementary material for: Strain Dependent Genetic Networks for Antibiotic-Sensitivity in a Bacterial Pathogen with a Large Pan-Genome
Source: PLOS journal article supplement (doi:10.1371/journal.ppat.1005869), 2016-09-08
Supplement: S3 (10.1371/journal.ppat.1005869.s003) [file journal.ppat.1005869.s003]

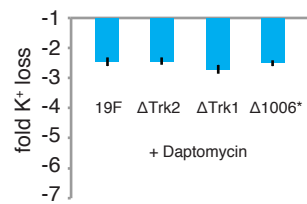

Supplementary Figure S3.
